# Supplementary material for: Inhibitory circuits control leg movements during Drosophila grooming
Source: eLife. 2026 Jan 27;14:RP106446. doi: 10.7554/eLife.106446 (PMC12844901; doi:10.7554/eLife.106446)
Supplement: Supplementary file 1. — The FANC identification numbers and coordinates, with the best matches in MANC and associated annotations, are listed for left and right neuromeres in the T1 segment. [file elife-106446-supp1.xlsx]

## Sheet: Table S1_ 13A and 13B neurons i
13A neurons (Right T1)	FANC id	FANC coordinates	MANC type (Marin et al.)	MANC id
13A-9d-Œ≥	648518346483079845	51783, 91222, 3558	IN13A001	10235
13A-10e-Œ¥	648518346486953441	55683, 94740, 3977	IN13A002	10820
13A-10f-Œ±	648518346502652839	55113, 92627, 3760	IN13A009	10230
13A-10g-Œ≤	648518346510045242	49361, 91971, 3631	~ IN13A003	~12376
13A-10a	648518346488772686	48080, 93048, 3688	slightly ~IN13A012	~10553
13A-10b	648518346470640126	50638, 88360, 3240
13A-10c	648518346496914477	49195, 88089, 3275	IN13A005	11770
13A-10d	648518346492366380	58416, 92888, 3866	~ IN13A015	~15715
13A-1a	648518346489892300	55164, 87638, 3027
13A-1b	648518346491127843	55377, 89872, 3431	~IN13A043	~30176
13A-1c	648518346490606940	50012, 90127, 3152
13A-1d	648518346504903795	58366, 89914, 3403
13A-1e	648518346490842877	55711, 89404, 3405
13A-1f	648518346511460661	52632, 89121, 3314
13A-2a	648518346489943859	54359, 90204, 3386	IN13A071	172784
13A-2b	648518346481847711	53810, 91185, 3527
13A-3a	648518346496910338	48329, 88933, 3191
13A-3b	648518346507220040	48745, 86752, 3123
13A-3c	648518346495944043	53074, 88563, 3247
13A-3d	648518346493957489	59092, 91455, 3623
13A-3e	648518346459856132	57694, 92199, 3883
13A-3f	648518346488925169	53850, 88166, 3202
13A-3g	648518346499567451	54722, 90871, 3568
13A-3h	648518346501458787	47416, 87026, 3109
13A-3i	648518346502499667	53488, 87133, 3119	~ IN13A055	~31435
13A-3j	648518346481824415	51296, 87792, 3193	~IN13A047	~22393
13A-3k	648518346477176080	59399, 89215, 3309
13A-4a	648518346481645249	52182, 87862, 3083	IN13A037	18827
13A-4b	648518346502031978	55938, 89655, 3206
13A-4c	648518346475742644	50180, 87749, 3125
13A-4d	648518346490002483	50758, 91265, 3410
13A-4e	648518346499555931	48796, 89383, 3166
13A-5a	648518346509759363	58488, 92096, 3744	IN13A060	23084
13A-5b	648518346475992546	50343, 87218, 3152
13A-5c	648518346515388743	55808, 91176, 3524	IN13A041	21874
13A-5d	648518346488810830	57104, 89816, 3457	IN13A060	16680
13A-5e	648518346488798392	57484, 91766, 3616
13A-5f	648518346486720303	50943, 90402, 3229
13A-5g	648518346496790140	54823, 88806, 3269
13A-5h	648518346490233883	51097, 89326, 3199
13A-6a-Œµ	648518346498563633	56616, 93624, 3918	IN13A011	162586
13A-6b	648518346496931586	56616, 92824, 4050	IN13A027	17619
13A-6c	648518346503236987	53992, 88752, 3163	IN13A027	17252
13A-6d	648518346496223178	58635, 90741, 3546		~19825
13A-6e	648518346491582906	59744, 88800, 3219	~IN13A042	~19825
13A-6f	648518346477206728	48760, 90632, 3495	IN13A020	16744
13A-7a	648518346475595904	51067, 89384, 3298
13A-7b	648518346493912056	57282, 90706, 3505
13A-7c	648518346481935037	53489, 89742, 3404
13A-8a	648518346507214367	47821, 91396, 3352
13A-8b	648518346492957870	49102, 89285, 3418
13A-8c	648518346507315528	49397, 90429, 3418
13A-8d	648518346477160720	51624, 90320, 3439	~IN13A051	~101053
13A-8e	648518346494637032	49326, 89758, 3240
13A-9a	648518346521654521	47508, 88652, 3276	IN13A050	31876
13A-9b	648518346496996404	49049, 92005, 3445
13A-9c	648518346518954719	54320, 87725, 3112	~IN13A035	~16080
13A-9e	648518346483398220	55912, 91368, 4070	IN13A014	12790
13A-9f	648518346507449887	58219, 93783, 3911
13A-9g	648518346500177663	47886, 89723, 3334
13A-9h	648518346491573690	52349, 88228, 3203
13A-9i	648518346524266501	50757, 88516, 3100
			~ somewhat similar
LINK R & L	13A right and Left
13B (Right T1)	FANC ID	cell body coordinates
13B-10a	648518346487050905	29608, 96504, 3357
13B-10b	648518346496337469	33624, 96848, 3441
13B-10c	648518346472698059	33032, 93768, 3319
13B-10d	648518346482001853	34904, 98024, 3432
13B-10e	648518346493383154	36624, 93656, 3314
13B-10f	648518346490249143	33056, 95648, 3415
13B-10g	648518346486447496	34000, 98264, 3320
13B-1a	648518346473301348	28462, 93468, 3173
13B-1b	648518346495825259	29612, 94321, 3266
13B-1c	648518346524174341	28242, 94354, 3181
13B-1d	648518346497088740	28092, 92452, 3172
13B-1e	648518346481492623	29186, 93423, 3245
13B-1f	648518346489719148	28457, 93932, 3304
13B-1g	648518346477208592	33378, 94661, 3356
13B-1h	648518346518812383	31525, 94153, 3238
13B-1i	648518346517337642	29000, 91552, 3131
13B-2a	648518346491055651	37806, 92227, 3272
13B-2b	648518346502643879	34607, 99358, 3478
13B-2c	648518346492013963	30112, 91667, 3096
13B-2d	648518346488885853	30810, 93887, 3273
13B-2e	648518346511706992	35618, 94709, 3364
13B-2g	648518346491540392	36192, 93148, 3349
13B-2h	648518346507671417	30219, 92361, 3195
13B-2i	648518346531614746	34433, 93768, 3164
13B-2j	648518346486358930	35954, 95571, 3290
13B-2k	648518346486579360	30546, 90926, 3140
13B-2l	648518346502083434	32316, 92824, 3251
13B-2x	648518346499593307	35320, 93548, 3219
13B-3a	648518346511380098	34532, 97120, 3352
13B-3b	648518346504189792	31828, 93758, 3295
13B-3c	648518346478258157	29011, 92164, 3202
13B-4a	648518346502171977	36238, 95692, 3413
13B-4b	648518346474473581	34613, 95266, 3354
13B-4c	648518346498710256	35403, 95923, 3438
13B-4d	648518346484593155	32137, 94237, 3174
13B-4e	648518346510036794	33595, 95110, 3307
13B-4f	648518346496723324	29822, 93229, 3230
13B-4g	648518346510015034	33157, 93079, 3227
13B-4h	648518346486377058	30561, 93180, 3167
13B-4i	648518346494421874	29334, 90576, 3099
13B-4j	648518346488235550	31496, 92024, 3192
13B-5b	648518346487880002	34720, 98730, 3515
13B-5c	648518346489590725	30272, 95432, 3382
13B-5d	648518346489713772	31040, 96408, 3343
13B-5e	648518346476010466	28936, 94968, 3262
13B-5f	648518346479581403	32440, 92056, 3236
13B-5g	648518346496414269	34248, 93712, 3324
13B-5a	648518346488443631	36146, 94512, 3237
13B-6a	648518346483420350	35720, 98288, 3469
13B-6b	648518346486357650	35476, 96698, 3464
13B-7a	648518346487047833	29792, 94176, 3141
13B-7b	648518346494016369	35224, 99176, 3410
13B-7c	648518346517501477	37864, 95976, 3308
13B-7d	648518346474731714	37488, 94352, 3360
13B-8a	648518346483038117	33872, 100552, 3614
13B-8b	648518346489995863	38720, 92192, 3220
13B-9a	648518346489035242	32656, 94800, 3287
13B-9b	648518346496206438	32328, 95784, 3321
13B-9c	648518346500201215	33200, 96408, 3311
13B-x	648518346499846213	36640, 96472, 3387
13B-X4	648518346500534332	37775, 95047, 3482
13B-X6	648518346481737921	[31528, 96264, 3440]
13B-X7	648518346481077338	31336, 92760, 3266
13B-x8	648518346489982771	31230, 94887, 3313
13A (T1 Left)	ID	coordinates
13A-Œ±	648518346500132614	24048, 93712, 3295
13A-Œ≤	648518346488838734	19600, 93632, 3325
13A-Œ≥	648518346484661507	20360, 91608, 3178
13A-Œ¥	648518346472722185	14392, 92936, 3157
13A-10b	648518346490196954	11993, 96131, 3206
13A-10c	648518346496087564	15440, 90440, 2896
13A-10d	648518346517571364	20640, 90256, 3025
13A-10e	648518346487847147	26480, 92792, 3168
13A-10f	648518346488990961	24120, 93088, 3163
13A-10g	648518346477777628	14312, 92192, 3010
13A-10h	648518346491793832	26288, 94336, 3338
13A-1a	648518346517685352	23448, 91080, 2938
13A-1b	648518346481678785	22904, 92040, 3154
13A-2a	648518346497137068	25416, 92152, 3026
13A-2b	648518346520616246	25320, 90816, 3143
13A-2c	648518346495795819	25112, 91168, 3016
13A-2d	648518346501310230	26800, 89112, 3011
13A-2e	648518346496635650	27968, 90056, 3090
13A-2f	648518346498525522	26168, 89584, 3047
13A-2g	648518346480238139	27160, 94768, 3286
13A-3a	648518346480464854	27280, 92072, 3106
13A-3b	648518346486759395	25184, 92936, 3089
13A-3c	648518346496505212	24136, 91152, 3031
13A-3d	648518346489955788	22707, 92458, 2894
13A-3e	648518346489955788	22584, 92112, 2938
13A-3g	648518346488710840	15496, 95368, 3409
13A-4a	648518346497975655	25344, 91616, 3099
13A-4b	648518346498584881	19048, 91616, 3033
13A-4c	648518346487654612	22128, 90520, 2913
13A-4d	648518346503987240	18200, 91224, 2997
13A-4e	648518346482173076	18200, 91280, 3108
13A-5a	648518346499451995	17320, 91016, 3019
13A-5b	648518346503984680	25656, 92024, 3195
13A-5c	648518346504048078	22216, 91328, 2984
13A-5d	648518346500110915	19272, 90032, 2944
13A-5e	648518346497071532	24760, 90064, 3066
13A-6-Œµ	648518346501484899	17272, 93616, 3314
13A-6a	648518346486939545	22016, 89800, 2979
13A-6b	648518346494486917	13072, 96624, 3346
13A-6c	648518346480509142	16288, 93240, 3200
13A-6d	648518346496880180	19008, 90376, 3020
13A-6e	648518346498076826	16056, 91864, 3106
13A-6f	648518346491107107	13406, 95317, 3281
13A-7a	648518346486288482	16160, 91072, 3025
13A-7b	648518346497160600	17376, 92256, 3201
13A-7c	648518346473216868	21136, 91840, 2978
13A-8a	648518346490517084	23328, 91256, 3163
13A-8b	648518346494588181	22264, 92496, 3250
13A-8c	648518346479107791	15211, 91401, 2990
13A-9a	648518346491531718	24144, 92464, 3027
13A-9b	648518346499795084	25168, 90208, 2944
13A-9c	648518346486941692	28176, 91208, 3159
13A-9d	648518346502646183	26429, 92938, 3243
13A-9e	648518346500029439	26720, 90856, 3149
13A-9f	648518346493247730	25832, 90424, 3032
13A-9g	648518346503131515	27056, 91952, 3212
13A	648518346476966088	21005, 92746, 3160
13A	648518346486963171	20384, 89590, 2927
13A	648518346489565548	23950, 90091, 2913
13A	648518346479948517	27753, 93259, 3244
13A	648518346496562517	25303, 93564, 3164
13A	648518346484458791	24178, 91813, 3112
13A	648518346508904255	17317, 92205, 3085
